# Supplementary material for: Metabolic Consequences of TGFβ Stimulation in Cultured Primary Mouse Hepatocytes Screened from Transcript Data with ModeScore
Source: Metabolites. 2012 Nov 21;2(4):983–1003. doi: 10.3390/metabo2040983 (PMC3901234; doi:10.3390/metabo2040983)
Supplement: Supplementary File 7 — Setting of the weights (PDF, 80 KB) [file metabolites-02-00983-s007.pdf]

# Setting of the weights

Andreas Hoppe

Definition of the weights adjustment  $\omega_i$ , see main manuscript.

| Reaction | weight<br>adjust |
|----------|------------------|----------|------------------|----------|------------------|----------|------------------|----------|------------------|----------|------------------|
| r0003    | 242              | r1210    | 8823             | r1382    | 6                | r2567    | 3370             | r2612    | 32080            | r2657    | 214              |
| r0004    | 242              | r1241    | 9248             | r1383    | 6                | r2568    | 33820            | r2613    | 3208             | r2658    | 11040            |
| r0016    | 2                | r1242    | 9175             | r1387    | 8                | r2569    | 3382             | r2614    | 29940            | r2659    | 1104             |
| r0017    | 2                | r1243    | 9047             | r1388    | 3                | r2570    | 36760            | r2615    | 2994             | r2660    | 8360             |
| r0018    | 4                | r1244    | 8556             | r1390    | 3                | r2571    | 3676             | r2616    | 35080            | r2661    | 836              |
| r0019    | 1                | r1245    | 8556             | r1393    | 7                | r2572    | 29980            | r2617    | 3508             | r2662    | 15100            |
| r0507    | 1                | r1246    | 8556             | r1402    | 350              | r2573    | 2998             | r2618    | 22840            | r2663    | 1510             |
| r0508    | 1                | r1247    | 7448             | r1403    | 350              | r2574    | 34900            | r2619    | 2284             | r2664    | 0                |
| r0609    | 2                | r1248    | 7728             | r1466    | 4                | r2575    | 3490             | r2620    | 25680            | r2665    | 0                |
| r0707    | 3                | r1249    | 8558             | r1489    | 3                | r2576    | 20560            | r2621    | 2568             | r2666    | 0                |
| r0781    | 3                | r1250    | 8823             | r1537    | 3                | r2577    | 2056             | r2622    | 19140            | r2667    | 0                |
| r0861    | 3                | r1280    | 15807            | r2075    | 3                | r2578    | 20380            | r2623    | 1914             | r2668    | 0                |
| r0878    | 3                | r1281    | 15807            | r2076    | 3                | r2579    | 2038             | r2624    | 9100             | r2669    | 0                |
| r1092    | 609              | r1284    | 10014            | r2077    | 4                | r2580    | 63540            | r2625    | 910              | r2670    | 0                |
| r1093    | 423              | r1285    | 10014            | r1047    | 0.2              | r2581    | 6354             | r2626    | 32520            | r2671    | 0                |
| r1094    | 418              | r1293    | 102              | r2465    | 0.05             | r2582    | 52300            | r2627    | 3252             | r2672    | 0                |
| r1095    | 4561             | r1294    | 166              | r2073    | 0.05             | r2583    | 5230             | r2628    | 10800            | r2673    | 0                |
| r1096    | 122              | r1305    | 985              | r2078    | 0.2              | r2584    | 45260            | r2629    | 1080             | r2674    | 0                |
| r1097    | 82               | r1333    | 609              | r2540    | 4880             | r2585    | 4526             | r2630    | 34280            | r2675    | 0                |
| r1098    | 81               | r1334    | 609              | r2541    | 488              | r2586    | 58880            | r2631    | 3428             | r2676    | 0                |
| r1099    | 98               | r1335    | 423              | r2542    | 13660            | r2587    | 5888             | r2632    | 13080            | r2677    | 0                |
| r1100    | 98               | r1336    | 423              | r2543    | 1366             | r2588    | 14880            | r2633    | 1308             | r2678    | 0                |
| r1101    | 2674             | r1337    | 418              | r2544    | 12480            | r2589    | 1488             | r2634    | 37200            | r2679    | 0                |
| r1102    | 406              | r1338    | 418              | r2545    | 1248             | r2590    | 14060            | r2635    | 3720             | r2680    | 0                |
| r1103    | 810              | r1339    | 267              | r2546    | 8120             | r2591    | 1406             | r2636    | 22500            | r2681    | 0                |
| r1104    | 622              | r1340    | 267              | r2547    | 812              | r2592    | 18420            | r2637    | 2250             | r2682    | 0                |
| r1105    | 698              | r1341    | 4561             | r2548    | 9440             | r2593    | 1842             | r2638    | 4860             | r2683    | 0                |
| r1112    | 316              | r1342    | 4561             | r2549    | 944              | r2594    | 13780            | r2639    | 486              | r2684    | 0                |
| r1113    | 267              | r1343    | 81               | r2550    | 29280            | r2595    | 1378             | r2640    | 8820             |          |                  |
| r1134    | 3                | r1344    | 98               | r2551    | 2928             | r2596    | 13680            | r2641    | 882              |          |                  |
| r1158    | 2945             | r1345    | 98               | r2552    | 27320            | r2597    | 1368             | r2642    | 6520             |          |                  |
| r1192    | 9172             | r1346    | 316              | r2553    | 2732             | r2598    | 13600            | r2643    | 652              |          |                  |
| r1193    | 9172             | r1347    | 316              | r2554    | 29740            | r2599    | 1360             | r2644    | 6260             |          |                  |
| r1198    | 9248             | r1348    | 2674             | r2555    | 2974             | r2600    | 36120            | r2645    | 626              |          |                  |
| r1199    | 8556             | r1349    | 2674             | r2556    | 29320            | r2601    | 3612             | r2646    | 5980             |          |                  |
| r1200    | 7448             | r1350    | 406              | r2557    | 2932             | r2602    | 34720            | r2647    | 598              |          |                  |
| r1201    | 7728             | r1351    | 406              | r2558    | 33380            | r2603    | 3472             | r2648    | 7520             |          |                  |
| r1202    | 8558             | r1352    | 810              | r2559    | 3338             | r2604    | 61260            | r2649    | 752              |          |                  |
| r1203    | 8823             | r1353    | 810              | r2560    | 34240            | r2605    | 6126             | r2650    | 23580            |          |                  |
| r1204    | 9175             | r1354    | 622              | r2561    | 3424             | r2606    | 14340            | r2651    | 2358             |          |                  |
| r1205    | 9047             | r1355    | 622              | r2562    | 33400            | r2607    | 1434             | r2652    | 23620            |          |                  |
| r1206    | 8556             | r1356    | 698              | r2563    | 3340             | r2608    | 35920            | r2653    | 2362             |          |                  |
| r1207    | 7448             | r1357    | 698              | r2564    | 33800            | r2609    | 3592             | r2654    | 6220             |          |                  |
| r1208    | 7728             | r1358    | 122              | r2565    | 3380             | r2610    | 27760            | r2655    | 622              |          |                  |
| r1209    | 8558             | r1359    | 82               | r2566    | 33700            | r2611    | 2776             | r2656    | 2140             |          |                  |
